# Supplementary material
Source: Springer Nature journal article supplement (https://www.springermedizin.de/resource/supplementary/12873_2012_163_MOESM2_ESM.pdf/9431588)
Supplement: MOESM2 [file 9431588]

**Monitorização Delírium  
Unidade Cuidados Intermédios do Serviço de  
Urgência**

IDENTIFICAÇÃO DO DOENTE

Confusion Assessment Method for the ICU(CAM-ICU)

Doente com patologia foro

MÉDICO

CIRÚRGICO

| DIA                                                             |         | _ / _ / _                                                                                                                                                          |          | _ / _ / _                    |    | _ / _ / _ |    | _ / _ / _ |    | _ / _ / _ |    |    |  |
|-----------------------------------------------------------------|---------|--------------------------------------------------------------------------------------------------------------------------------------------------------------------|----------|------------------------------|----|-----------|----|-----------|----|-----------|----|----|--|
| HORA                                                            |         | Ad: _                                                                                                                                                              | 12       | 24                           | 12 | 24        | 12 | 24        | 12 | 24        | 12 | 24 |  |
| RASS<br><small>Escala de agitação e sedação de Richmond</small> | *4      | <b>COMBATIVO</b> , abertamente combativo, violento, representa perigo imediato para pessoal UCI                                                                    |          |                              |    |           |    |           |    |           |    |    |  |
|                                                                 | *3      | <b>MUITO AGITADO</b> , puxa ou retira tubos ou catéteres; agressivo                                                                                                |          |                              |    |           |    |           |    |           |    |    |  |
|                                                                 | *2      | <b>AGITADO</b> , movimentos não intencionais frequentes; luta contra o ventilador                                                                                  |          |                              |    |           |    |           |    |           |    |    |  |
|                                                                 | *1      | <b>INQUIETO</b> , ansioso mas os movimentos não são agressivos                                                                                                     |          |                              |    |           |    |           |    |           |    |    |  |
|                                                                 | 0       | <b>DESPERTO E CALMO</b>                                                                                                                                            |          |                              |    |           |    |           |    |           |    |    |  |
|                                                                 | -1      | <b>CONFUSO</b> , não está completamente desperto, mas consegue manter-se acordado (abertura dos olhos/contacto dos olhos) à voz > 10 segundos - estimulação verbal |          |                              |    |           |    |           |    |           |    |    |  |
|                                                                 | -2      | <b>SEDAÇÃO LIGEIRA</b> , acorda por breves períodos com contacto dos olhos à voz (< 10 segundos) - estimulação verbal                                              |          |                              |    |           |    |           |    |           |    |    |  |
|                                                                 | -3      | <b>SEDAÇÃO MODERADA</b> , movimento ou abertura de olhos à voz (mas sem contacto dos olhos) - estimulação verbal                                                   |          |                              |    |           |    |           |    |           |    |    |  |
|                                                                 | -4      | <b>SEDAÇÃO PROFUNDA</b> , não responde à voz, mas movimentos ou abertura dos olhos com estímulo tátil - estimulação física ( <b>PARAR E REAVALIAR MAIS TARDE</b> ) |          |                              |    |           |    |           |    |           |    |    |  |
|                                                                 | -5      | <b>NÃO DESPERTÁVEL</b> , não responde à voz ou ao estímulo tátil - estimulação física ( <b>PARAR E REAVALIAR MAIS TARDE</b> )                                      |          |                              |    |           |    |           |    |           |    |    |  |
| CAM-ICU                                                         | PASSOS  |                                                                                                                                                                    |          |                              |    |           |    |           |    |           |    |    |  |
|                                                                 | 1       | Início agudo de alterações do estado mental ou curso flutuante                                                                                                     | SIM      | PASSAR PARA PASSO 2          |    |           |    |           |    |           |    |    |  |
|                                                                 |         |                                                                                                                                                                    | NÃO      | SEM DELIRIUM                 |    |           |    |           |    |           |    |    |  |
|                                                                 | 2       | Falta de atenção                                                                                                                                                   | SIM      | PASSAR PARA PASSO 3          |    |           |    |           |    |           |    |    |  |
|                                                                 |         |                                                                                                                                                                    | NÃO      | SEM DELIRIUM                 |    |           |    |           |    |           |    |    |  |
|                                                                 |         |                                                                                                                                                                    | Palavras |                              |    |           |    |           |    |           |    |    |  |
|                                                                 |         |                                                                                                                                                                    | Imagens  |                              |    |           |    |           |    |           |    |    |  |
|                                                                 | 3       | Nível de consciência alterado                                                                                                                                      | SIM      | RASS ≠ 0 - <b>DELIRIUM</b>   |    |           |    |           |    |           |    |    |  |
|                                                                 |         |                                                                                                                                                                    | NÃO      | RASS = 0 PASSAR PARA PASSO 4 |    |           |    |           |    |           |    |    |  |
|                                                                 | 4       | Pensamento desorganizado                                                                                                                                           | SIM      | (> 1 ERRO) - <b>DELIRIUM</b> |    |           |    |           |    |           |    |    |  |
|                                                                 |         |                                                                                                                                                                    | NÃO      | SEM DELIRIUM                 |    |           |    |           |    |           |    |    |  |
|                                                                 | RÚBRICA |                                                                                                                                                                    |          |                              |    |           |    |           |    |           |    |    |  |
| Nº OE                                                           |         |                                                                                                                                                                    |          |                              |    |           |    |           |    |           |    |    |  |
